# Supplementary material for: Platinum complexes of diazo ligands. Studies of regioselective aromatic ring amination, oxidative halogen addition and reductive halogen elimination reactions
Source: Royal Society of Chemistry journal article supplement (doi:10.1039/b418470j), 2005-01-01
Supplement: b418470j.pdf [file b418470j.pdf]

Electronic Supplementary Information for Dalton Transactions  
This journal is © The Royal Society of Chemistry 2005

**Supplementary Table:**

**Table S1 Secondary interactions for the complexes 1c, 2b, 4 and 5****1c.***Pt...Pt Contacts*

| Contacts               | Distance |
|------------------------|----------|
| Pt1 → Pt1 <sup>i</sup> | 3.699(1) |

Symmetry code: (i) = -x, -y, 1-z;

**2b.***π... π interaction*

| Ring(i) → Ring(j)           | Dihedral angle(i,j) | Distance between cg(i) & cg(j) | ⊥ Distance between cg(i) & cg(j) |
|-----------------------------|---------------------|--------------------------------|----------------------------------|
| Ring1 → Ring2 <sup>i</sup>  | 1.34                | 3.606                          | 3.253                            |
| Ring1 → Ring2 <sup>ii</sup> | 1.34                | 4.153                          | 3.301                            |

*Metal... π interaction*

| M → Ring(i)               | Distance between Metal & cg(i) | ⊥ Distance Metal to ring(i) |
|---------------------------|--------------------------------|-----------------------------|
| Pt1 → Ring2 <sup>i</sup>  | 3.606                          | 3.253                       |
| Pt1 → Ring2 <sup>ii</sup> | 4.153                          | 3.301                       |

Symmetry code: (i) = 1-x, 1-y, 1-z; (ii) = 2-x, 1-y, 1-z;

Ring1 = N11-C11-C12-C13-C14-C15; Ring2 = C16-C17-C18-C19-C20-C21

**4.***π... π interaction*

|                             |      |       |       |
|-----------------------------|------|-------|-------|
| Ring1 → Ring2 <sup>i</sup>  | 2.77 | 3.774 | 4.063 |
| Ring1 → Ring2 <sup>ii</sup> | 2.77 | 3.774 | 4.063 |

*Br...Br Contacts*

| Contacts                 | Distance |
|--------------------------|----------|
| Br1 → Br2 <sup>iii</sup> | 3.598(1) |
| Br2 → Br1 <sup>iv</sup>  | 3.598(1) |
| Br3 → Br3 <sup>v</sup>   | 3.399(1) |

Symmetry code: (i) = x, 1+y, z; (ii) = x, -1+y, z; (iii) = 2-x, -1/2+y, 1/2-z;

(iv) = 2-x, 1/2+y, 1/2-z; (v) = 1-x, 1-y, -z

Ring1 = N1-C1-C2-C3-C4-C5; Ring2 = C6-C7-C8-C9-C10-C11

**5.***π... π interaction*

|                              |       |       |       |
|------------------------------|-------|-------|-------|
| Ring1 → Ring2 <sup>i</sup>   | 10.26 | 4.178 | 3.307 |
| Ring2 → Ring1 <sup>ii</sup>  | 10.26 | 4.178 | 3.307 |
| Ring1 → Ring2 <sup>iii</sup> | 2.16  | 4.225 | 3.451 |

Symmetry code: (i) = 1/2-x, -1/2+y, 1/2-z; (ii) = 1/2-x, 1/2+y, 1/2-z; (iii) = -x, -y, -z

Ring1 = N1-C1-C2-C3-C4-C5; Ring2 = C6-C7-C8-C9-C10-C11

**Supplementary Figure Captions:**

**Colour Scheme for Fig. S1,S2,S4 and S5:** Pt- Green, C- Black, N- Blue, Cl- Yellow, Br- Violet and I- Orange.

- Fig. S1:** A supramolecular dimer of  $[\text{PtCl}_2(\text{L}^{1\text{c}})]$  **1c** formed by  $\pi\cdots\pi$  interaction.
- Fig.S2:** 1D supramolecular chain of  $[\text{PtCl}(\text{L}^{2\text{b}})]$  **2b** constructed by  $\pi\cdots\pi$ , Pt... $\pi$  interaction running along b axis.
- Fig. S3:** ORTEP and atom numbering scheme for  $[\text{PtBr}_3(\text{L}^{2\text{a}})]$ , **4**. Hydrogen atoms are omitted for clarity.
- Fig. S4:** A 2D sheet of  $[\text{PtBr}_3(\text{L}^{2\text{a}})]$  **4** constructed from  $\pi$ -stacking and Br...Br contacts viewing down *ac* diagonal.
- Fig. S5:** A dimeric unit of  $[\text{PtClI}_2(\text{L}^{2\text{a}})]$  **5** constructed by  $\pi\cdots\pi$  stacking interaction.
- Fig. S6:** Segmented cyclic voltammogram of  $[\text{PtCl}_2(\text{L}^{1\text{a}})]$  **1a** (- - -),  $[\text{PtCl}(\text{L}^{2\text{a}})]$  **2a** (—) and  $[\text{PtClI}_2(\text{L}^{2\text{a}})]$  **5** (— — —).
- Fig. S7:** UV-Vis spectra of **1a** (-.-.-) in dimethyl formamide, **2a** (- - -) and **5** (—) in dichloromethane.

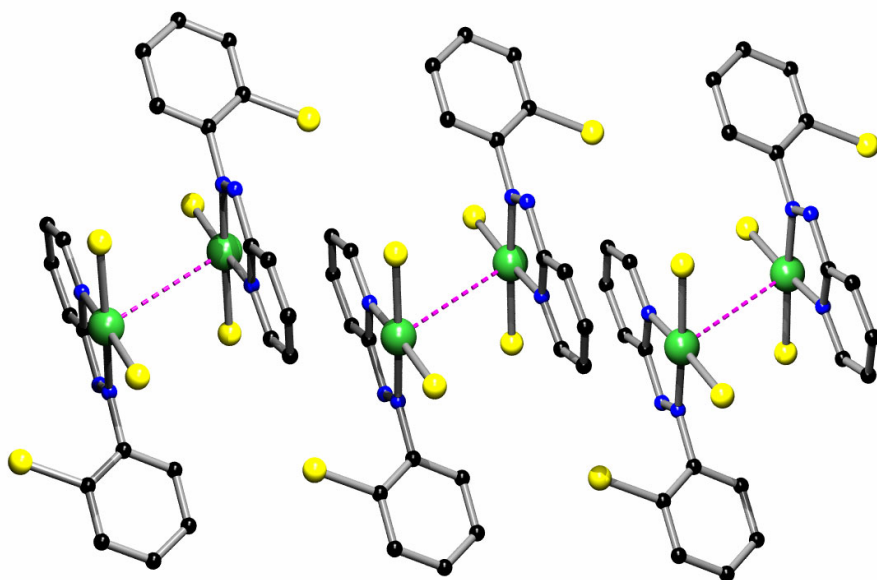

Fig. S1

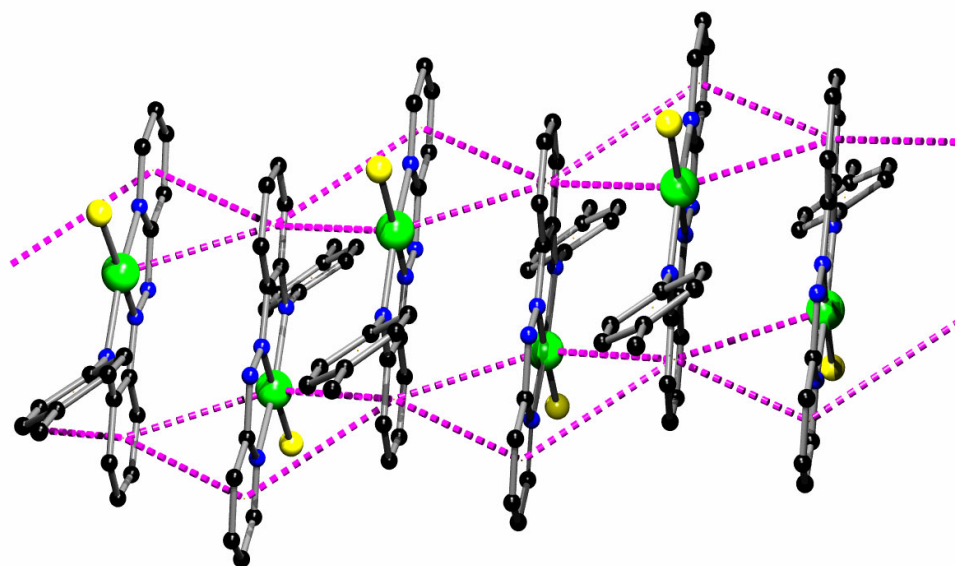

Fig. S2

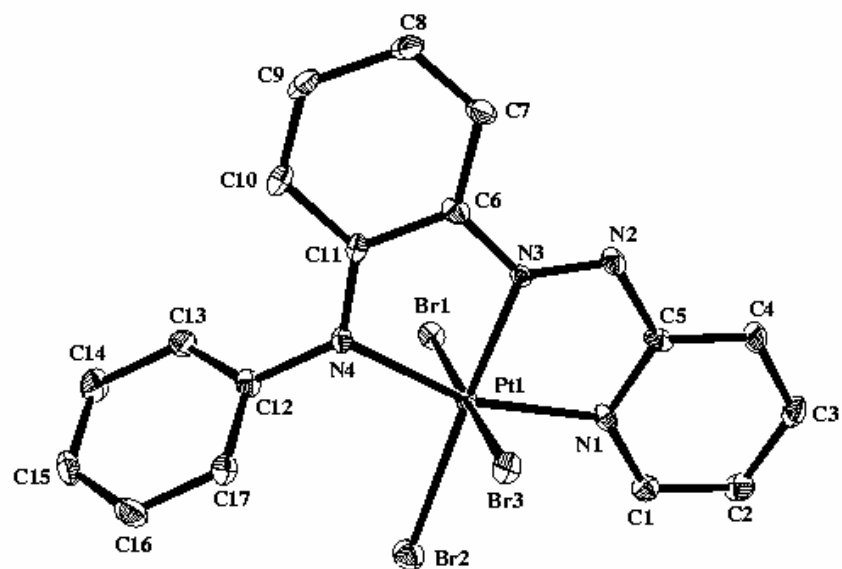

Fig. S3

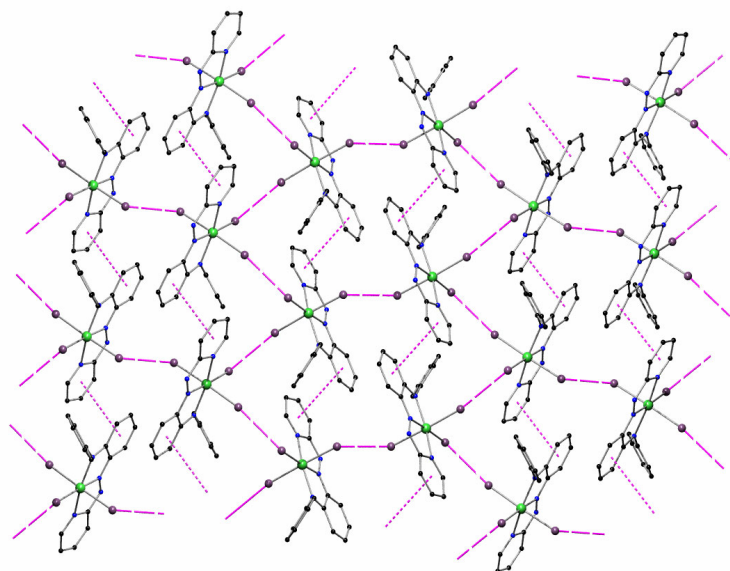

**Fig. S4**

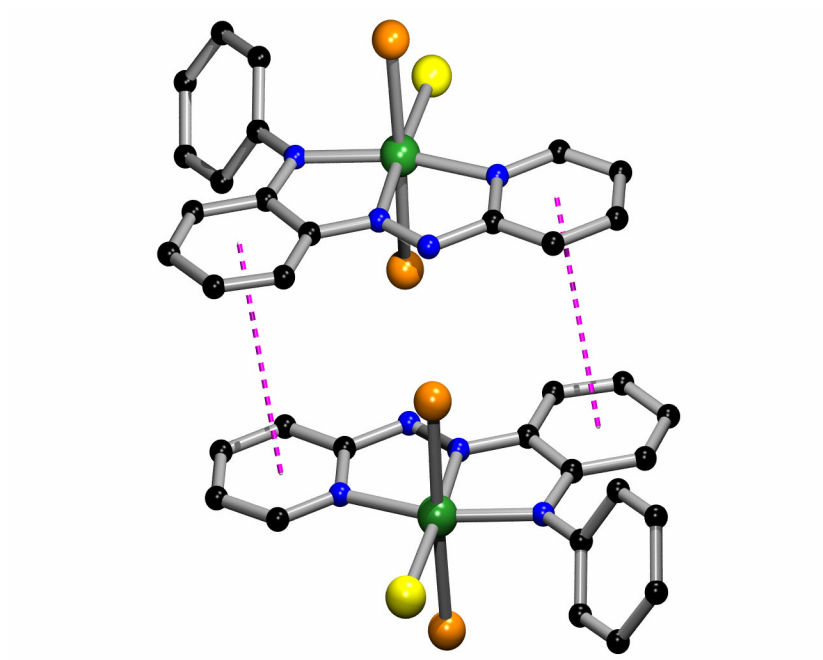

Fig. S5



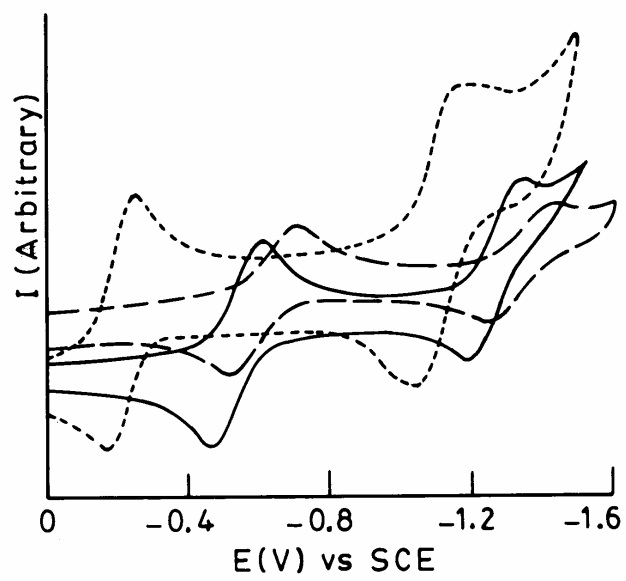**Fig. S6**

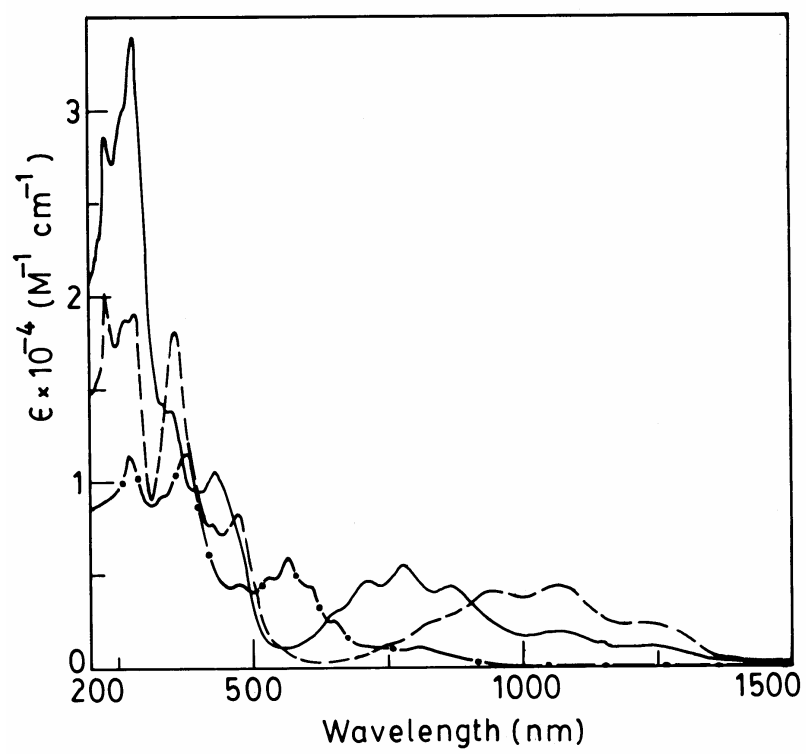**Fig. S7**
